# Supplementary material for: A role for glial fibrillary acidic protein (GFAP)-expressing cells in the regulation of gonadotropin-releasing hormone (GnRH) but not arcuate kisspeptin neuron output in male mice
Source: eLife. 2021 Jul 22;10:e68205. doi: 10.7554/eLife.68205 (PMC8337074; doi:10.7554/eLife.68205)
Supplement: Figure 1—source data 1. [file elife-68205-fig1-data1.xlsx]

## Sheet: Dq, Di mCherry coloc
Total cells counted per animal													Astro
													mCherry	Gq	Gi
	Anx	virus	region	TOTAL S100b + mCherry	TOTAL NeuN mCherry	Other mCherry	Total counted mCherry cells		% Astro	% neurons	% other		86.6	88.29	93.07
	#705	GFAP-mCherry	POA	465	30	42	537		86.5922	5.58659	7.82123		95.1	90.94	91.05
	#614	GFAP-mCherry	POA	894	23	23	940		95.1064	2.44681	2.44681		93.76	95.66	90.55
	#615	GFAP-mCherry	POA	691	36	10	737		93.7585	4.88467	1.35685		96.03	90.28	87.93
	#53	GFAP-Dq-mCherry	POA	641	55	30	726		88.292	7.57576	4.13223		96.48	92.29
	#186	GFAP-Dq-mCherry	POA	733	64	9	806		90.9429	7.94045	1.11663		96.21	93.8
	#811	GFAP-Dq-mCherry	POA	903	31	10	944		95.6568	3.2839	1.05932
	#92	GFAP-mCherry	ARC	992	20	21	1033		96.031	1.93611	2.03291		Neurons
	#137	GFAP-mCherry	ARC	1069	26	13	1108		96.4801	2.34657	1.17329		mCherry	Gq	Gi
	#364	GFAP-mCherry	ARC	938	17	20	975		96.2051	1.74359	2.05128		5.58	7.58	5.53
	#216	GFAP-Dq-mCherry	ARC	873	82	12	967		90.2792	8.47983	1.24095		2.45	7.94	7.25
	#217	GFAP-Dq-mCherry	ARC	897	57	18	972		92.284	5.8642	1.85185		4.88	3.28	8.05
	#417	GFAP-Dq-mCherry	ARC	1287	67	18	1372		93.8047	4.88338	1.31195		1.94	8.48	10.57
													2.35	5.86
	Anx	virus	region	TOTAL S100b + mCherry	TOTAL NeuN mCherry	Other mCherry	Total counted mCherry cells		% Astro	% neurons	% other		1.74	4.89
	#4	GFAP-Di-mCherry	POA	1061	63	16	1140		93.0702	5.52632	1.40351
	#65	GFAP-Di-mCherry	POA	1018	81	19	1118		91.0555	7.24508	1.69946		Other
	#66	GFAP-Di-mCherry	POA	968	86	15	1069		90.5519	8.0449	1.40318		mCherry	Gq	Gi
	#67	GFAP-Di-mCherry	POA	765	92	13	870		87.931	10.5747	1.49425		7.82	4.13	1.4
													2.45	1.12	1.7
													1.36	1.06	1.4
													2.03	1.24	1.5
													1.17	1.85
													2.05	1.31

## Sheet: GFAP S100b coloc
	Anx	virus	region	S100b	S100b + GFAP	GFAP	Total counted cells	Total GFAP cells	%GFAP that colocalize with S100
	#217	GCAMP6f	POA and ARC	17	398	50	465	448	88.8393
	#216	GCAMP6f	POA and ARC	4	465	44	513	509	91.3556
	#417	GCAMP6f	POA and ARC	8	774	84	866	858	90.2098
						% S100b	%GFAP	%BOTH	% GFAP stained by S100b
					#217	3.66	10.75	85.59	88.84	100
					#216	0.78	8.58	90.64	91.36	100
					#417	0.92	9.7	89.38	90.21	100

## Sheet: GCAMP6f S100b coloc
	Anx	virus	region	GCAMP6f + S100b	GCAMP6f only	Total GCAMP6f cells	% GCAMP6f that are astrocytes
	#1	GCAMP6f	POA	447	36	483	92.5466
	#Tg72	GCAMP6f	POA and ARC	854	51	905	94.3646
	#7g73	GCAMP6f	POA and ARC	782	24	806	97.0223
