# Supplementary material for: A role for glial fibrillary acidic protein (GFAP)-expressing cells in the regulation of gonadotropin-releasing hormone (GnRH) but not arcuate kisspeptin neuron output in male mice
Source: eLife. 2021 Jul 22;10:e68205. doi: 10.7554/eLife.68205 (PMC8337074; doi:10.7554/eLife.68205)
Supplement: Source data 1. [file elife-68205-data1.xlsx]

## Sheet: AAV GFAP-Dq POA GnRH male
INTACT MALES	AAV GFAP-mCherry POA GnRH male (control)										AAV GFAP-Dq POA GnRH male (inside hit)										AAV GFAP-Dq POA GnRH male (outside hit, no mCherry around)										AAV GFAP-Dq POA GnRH male (inside hit) + EP1 EP2 antagonists
	#cell	CNO conc	Baseline	CNO	Wash	fold increase (bas-CNO)	% change (bas-CNO)	neurons infected on slice			#cell	CNO conc	Baseline	CNO	Wash	fold increase (bas-CNO)	% change (bas-CNO)	neurons infected on slice			#cell	CNO conc	Baseline	CNO	Wash	fold increase (bas-CNO)	% change (bas-CNO)	neurons infected on slice			#cell	CNO conc	Baseline	CNO	Wash	fold increase (bas-CNO)	% change (bas-CNO)	neurons infected on slice
	1	0.5	0.0722222	0.116667	0.0611111	0.615385	61.5385	none			1	0.2	0	0.833333	1.00556	#DIV/0!	#DIV/0!	none			1	0.2	0.161111	0.0666667	0.0444444	-0.586207	-58.6207	none			1	0.0111111	0	0.0111111	0.0111111	#DIV/0!	#DIV/0!	none
	2	0.5	0.366667	0.544444	0.711111	0.484848	48.4848	none			2	0.2	0.222222	0.533333	0.105556	1.4	140	none			2	0.2	0.205556	0.172222	0.483333	-0.162162	-16.2162	none			2	0.388889	0.338889	0.0944444	1.67778	-0.721311	-72.1311	none
	3	0.5	0.05	0.0166667	0.1	-0.666667	-66.6667	none			3	0.2	0.0333333	0.311111	0.15	8.33333	833.333	none			3	0.2	0.266667	0.194444	0.127778	-0.270833	-27.0833	none			3	0.333333	0.372222	2.17222	2.06667	4.83582	483.582	none
	4	0.2	0.966667	0.766667	0.888889	-0.206897	-20.6897	none			4	0.2	0.355556	1.95	2.85556	4.48437	448.437	none			4	0.2	0.183333	0.0111111	0.0722222	-0.939394	-93.9394	none			4	0.194444	0.288889	0.0833333	0.0277778	-0.711538	-71.1538	none
	5	0.2	0	0	0	#DIV/0!	#DIV/0!	none			5	0.2	0	0	0	#DIV/0!	#DIV/0!	none			5	0.2	0.216667	0.227778	0.372222	0.0512821	5.12821	none			5	0.916667	0.277778	0.888889	0.283333	2.2	220	none
	6	0.5	0.0611111	0.0111111	0.00555556	-0.818182	-81.8182	none			6	0.2	0.0444444	1.46111	2.10556	31.875	3187.5	none			6	0.2	0	0	0	#DIV/0!	#DIV/0!	none			6	0	0	0.344444	0.877778	#DIV/0!	#DIV/0!	none
	7	0.2	0.0111111	0	0.0333333	-1	-100	none			7	0.2	0.266667	0.566667	0.383333	1.125	112.5	none			7	0.2	0.1	0.0777778	0.183333	-0.222222	-22.2222	none			7	0	0	0.194444	0.416667	#DIV/0!	#DIV/0!	none
	8	0.5	0.638889	0.594444	0.166667	-0.0695652	-6.95652	none			8	0.2	0.172222	1.37222	1.4	6.96774	696.774	none			8	0.2	1.87222	1.06111	1.88889	-0.433234	-43.3234	none			8	0	0	0.1	0.277778	#DIV/0!	#DIV/0!	none
	9	0.2	0.216667	0.133333	0.216667	-0.384615	-38.4615	none			9	0.2	0.0611111	2.67778	3.50556	42.8182	4281.82	none													9	0.327778	0.327778	0.188889	0.183333	-0.423729	-42.3729	none
	10	0.2	0.0555556	0.0833333	0.194444	0.5	50	none																							10	0.00555556	0	0	0	#DIV/0!	#DIV/0!	none
																															11	0.00555556	0	0	0	#DIV/0!	#DIV/0!	none
excluded because neurons infection on slice
	#cell	CNO conc	Baseline	CNO	Wash	fold increase (bas-CNO)	% change (bas-CNO)																								excluded because neurons infection on slice
	1	0.5	0	0	0.0222222	#DIV/0!	#DIV/0!	8																							#cell	CNO conc	Baseline	CNO	Wash	fold increase (bas-CNO)	% change (bas-CNO)	neurons infected on slice
	2	0.2	0	0.0444444	0	#DIV/0!	#DIV/0!	5																							1	0.0944444	0.05	0.0111111	0.0111111	-0.777778	-77.7778	11

## Sheet: AAV GFAP-Dq ARC KNDy male
INTACT MALES	AAV GFAP-mCherry ARC KNDy male (control)										AAV GFAP-Dq ARC KNDy male (inside hit)									AAV GFAP-Dq ARC KNDy male (outside hit, no mCherry around)																GFAP-Dq mCherry (NO mCherry around) virus in ARC, intact male
	#cell	CNO conc	Baseline	CNO	Wash	fold increase (bas-CNO)	% change (bas-CNO)	neurons infected on slice			#cell	CNO conc	Baseline	CNO	Wash	fold increase (bas-CNO)	% change (bas-CNO)	neurons infected on slice		#cell	CNO conc	Baseline	CNO	Wash	fold increase (bas-CNO)	% change (bas-CNO)	neurons infected on slice							cell ID		Rx duration	Baseline	0.5uM CNO	Washout	fold increase (bas-CNO)	% change	pipet R (MOhm)	average R (MOhm)	Age (days)	weight seminals (mg)	Body weight (g)	#anx	hit	neurons infected
	1	0.2	0	0	0	#DIV/0!	#DIV/0!	none			1	0.2	0	0.0333333	0	#DIV/0!	#DIV/0!	none		1	0.2	0.00555556	0	0.0111111	-1	-100	none							20190509a		6						2.5	6.13	189	287	29	#141	MISS	none
	2	0.2	0.155556	0.2	0.227778	0.285714	28.5714	none			2	0.2	0.1	0.216667	0.322222	1.16667	116.667	none		2	0.2	0.0888889	0.744444	0.633333	7.375	737.5	none							20190509b		6						2.4	8.77	189	287	29	#141	MISS	none
	3	0.2	0.0277778	0.0333333	0.0111111	0.2	20	none			3	0.2	0.472222	1.03889	1.33333	1.2	120	none		3	0.2	0.0944444	0.0888889	0.161111	-0.0588235	-5.88235	none							20190515c		6						2.3	6.87	195	/	30	#138	MISS	none
	4	0.2	0.0111111	0.00555556	0.00555556	-0.5	-50	none			4	0.2	0.0111111	0.0111111	0.572222	0	0	none		4	0.2	0.0833333	0.188889	0.338889	1.26667	126.667	none							20190515d		6						2.9	7.46	195	/	30	#138	MISS	none
	5	0.2	0.00555556	0.0222222	0.0555556	3	300	none			5	0.2	0	0.00555556	0.00555556	#DIV/0!	#DIV/0!	none																animals per group :		2
	6	0.2	0.494444	0.788889	0.511111	0.595506	59.5506	none			6	0.2	0	0	0	#DIV/0!	#DIV/0!	none																								2 anx		189	287	29	#141	MISS
	7	0.2	0.0111111	0.0388889	0.1	2.5	250	none			7	0.2	0.0166667	0.0555556	0.283333	2.33333	233.333	none																										195	/	30	#138	MISS
	8	0.2	0	0	0.0333333	#DIV/0!	#DIV/0!	none			8	0.2	0.0388889	0	0	-1	-100	none
	9	0.2	0	0.00555556	0.0388889	#DIV/0!	#DIV/0!	none			9	0.2	0	0	0.138889	#DIV/0!	#DIV/0!	none
											10	0.2	0.0333333	0.00555556	0.133333	-0.833333	-83.3333	none
excluded because neurons infection on slice											11	0.2	0	0	0	#DIV/0!	#DIV/0!	none
	#cell	CNO conc	Baseline	CNO	Wash	fold increase (bas-CNO)	% change (bas-CNO)	neurons infected on slice
	1	0.2	0.0666667	0.0444444	0.122222	-0.333333	-33.3333	1kiss-mCherry			excluded because neurons infection on slice
	2	0.2	0	0	0.255556	#DIV/0!	#DIV/0!	2			#cell	CNO conc	Baseline	CNO	Wash	fold increase (bas-CNO)	% change (bas-CNO)	neurons infected on slice
	3	0.2	0.266667	0.333333	0.627778	0.25	25	2			1	0.2	0.705556	3.02778	3.36667	3.29134	329.134	>10
											2	0.2	0.777778	5.81111	4.93889	6.47143	647.143	2kiss-mCherry
											3	0.2	0.0166667	0.0611111	0.0166667	2.66667	266.667	8

## Sheet: AAV GFAP-Dq POA GnRH female
INTACT FEMALES	AAV GFAP-mCherry POA GnRH female (control)										AAV GFAP-Dq POA GnRH female (inside hit)
	#cell	CNO conc	Baseline	CNO	Wash	fold increase (bas-CNO)	% change (bas-CNO)	neurons infected on slice			#cell	CNO conc	Baseline	CNO	Wash	fold increase (bas-CNO)	% change (bas-CNO)	neurons infected on slice
	1	0.2	0.0277778	0.555556	0.683333	19	1900	none			1	0.2	0	0	0	#DIV/0!	#DIV/0!	none
	2	0.2	0	0	0	#DIV/0!	#DIV/0!	none			2	0.2	0.183333	0	0	-1	-100	none
	3	0.2	0.1	0.133333	0.294444	0.333333	33.3333	none			3	0.2	0.2	0	0.244444	-1	-100	none
	4	0.2	0	0.277778	0	#DIV/0!	#DIV/0!	none			4	0.2	0.311111	0.194444	0.166667	-0.375	-37.5	none
	5	0.2	0.0444444	0	0	-1	-100	none			5	0.2	0.0944444	0.0277778	0.15	-0.705882	-70.5882	none
	6	0.2	0.0277778	0.0944444	0.238889	2.4	240	none			6	0.2	0	0	0.0388889	#DIV/0!	#DIV/0!	none
	7	0.2	0.0388889	0.0666667	0.238889	0.714286	71.4286	none			7	0.2	0.472222	0	0.144444	-1	-100	none
	8	0.2	0	0	0	#DIV/0!	#DIV/0!	none			8	0.2	0.116667	0.144444	0.116667	0.238095	23.8095	none
	9	0.2	0.0166667	0.0111111	0.105556	-0.333333	-33.3333	none			9	0.2	0.205556	0.361111	0.427778	0.756757	75.6757	none
	10	0.2	0.0222222	0.0222222	0.0111111	0	0	none			10	0.2	0	0	0	#DIV/0!	#DIV/0!	none
	11	0.2	0.488889	0.538889	0.722222	0.102273	10.2273	none
	12	0.2	0.144444	0.0388889	0.0333333	-0.730769	-73.0769	none			excluded because neurons infection on slice
	13	0.2	0.238889	0.305556	0.25	0.27907	27.907	none			#cell	CNO conc	Baseline	CNO	Wash	fold increase (bas-CNO)	% change (bas-CNO)	neurons infected on slice
											1	0.2	0.355556	2.92222	3.58333	7.21875	721.875	6
											2	0.2	0.438889	0.911111	1.41111	1.07595	107.595	>10
											3	0.2	0.161111	3.91111	4.03889	23.2759	2327.59	25
											4	0.2	0.8	3.60556	6.55556	3.50694	350.694	15

## Sheet: AAV GFAP-Di POA GnRH male
Castrated MALES	AAV GFAP-mCherry POA GnRH male (control)										AAV GFAP-Di POA GnRH male (inside hit)										AAV GFAP-Dq POA GnRH male (outside hit, no mCherry around)
	#cell	CNO conc	Baseline	CNO	Wash	fold increase (bas-CNO)	% change (bas-CNO)	neurons infected on slice			#cell	CNO conc	Baseline	CNO	Wash	fold increase (bas-CNO)	% change (bas-CNO)	neurons infected on slice			#cell	CNO conc	Baseline	CNO	Wash	fold increase (bas-CNO)	% change (bas-CNO)	neurons infected on slice
	1	0.2	0.116667	0.0222222	0.0222222	-0.809524	-80.9524	none			1	0.2	0.122222	0	0.266667	-1	-100	none			1	0.2	0.144444	0.344444	0.283333	1.38462	138.462	none
	2	0.2	0.05	0.0388889	0.0222222	-0.222222	-22.2222	none			2	0.2	0.233333	0.161111	0.0222222	-0.309524	-30.9524	none			2	0.2	0.166667	0.0555556	0.227778	-0.666667	-66.6667	none
	3	0.2	0.0444444	0.0444444	0.133333	0	0	none			3	0.2	0.0611111	0.0222222	0	-0.636364	-63.6364	none			3	0.2	0.105556	0.0444444	0.0444444	-0.578947	-57.8947	none
	4	0.2	0.138889	0.05	0.177778	-0.64	-64	none			4	0.2	0.544444	0.305556	0.0722222	-0.438776	-43.8776	4
	5	0.2	1.03889	0.983333	0.844444	-0.0534759	-5.34759	none			5	0.2	0.977778	0.877778	0.488889	-0.102273	-10.2273	none
	6	0.2	0.255556	0.194444	0.311111	-0.23913	-23.913	none			6	0.2	0.755556	0.533333	0.544444	-0.294118	-29.4118	none
	7	0.2	0.494444	1.41667	2.35	1.86517	186.517	2			7	0.2	0.522222	0.188889	0.0333333	-0.638298	-63.8298	none
	8	0.2	0.155556	0.35	0.466667	1.25	125	none			8	0.2	0.433333	0.438889	1.72778	0.0128205	1.28205	none
	9	0.2	0.122222	0.0666667	0.305556	-0.454545	-45.4545	none			9	0.2	0	0	0.0444444	#DIV/0!	#DIV/0!	8
											10	0.2	1.03889	0.922222	0.827778	-0.112299	-11.2299	5
											11	0.2	1.46667	0.338889	0.177778	-0.768939	-76.8939	4
											12	0.2	0.972222	0.85	1.22778	-0.125714	-12.5714	none
											13	0.2	0.155556	0.172222	0.272222	0.107143	10.7143	none
											14	0.2	0.466667	0.188889	0.661111	-0.595238	-59.5238	2
											15	0.2	0.105556	0	0	-1	-100	none
											16	0.2	0.0333333	0.0444444	0.05	0.333333	33.3333	none
