# Supplementary figures and images for: A role for glial fibrillary acidic protein (GFAP)-expressing cells in the regulation of gonadotropin-releasing hormone (GnRH) but not arcuate kisspeptin neuron output in male mice
Source: eLife journal article supplement (doi:10.7554/elife.68205), 2021-07-22

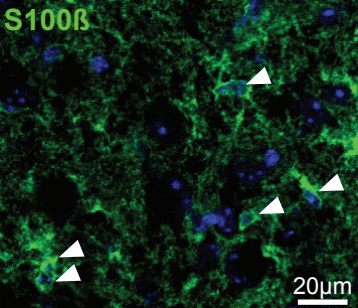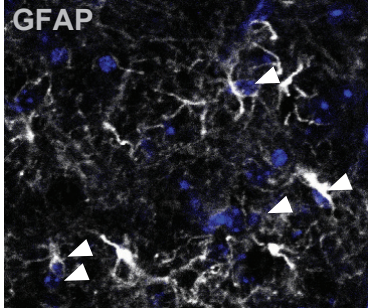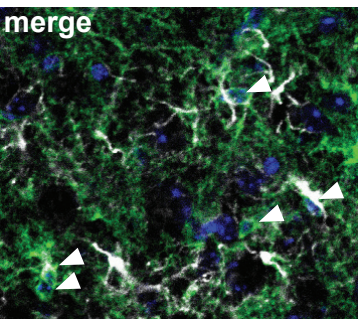

**% colocalization**

GFAP  
only 10%

S100 $\beta$   
only 1%

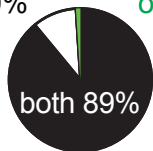

Supplement: supp [file elife-68205-supp-v1.zip]

## AAV-mCherry

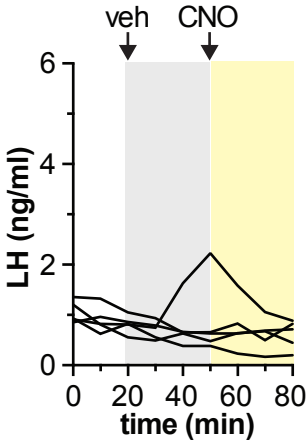

## AAV-Gg

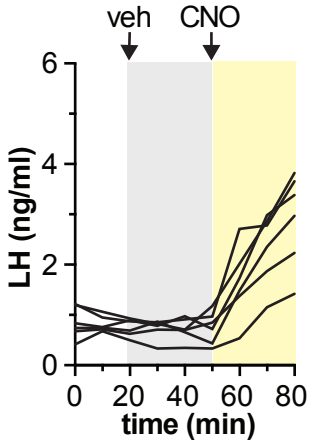

Supplement: supp [file elife-68205-supp-v1.zip]

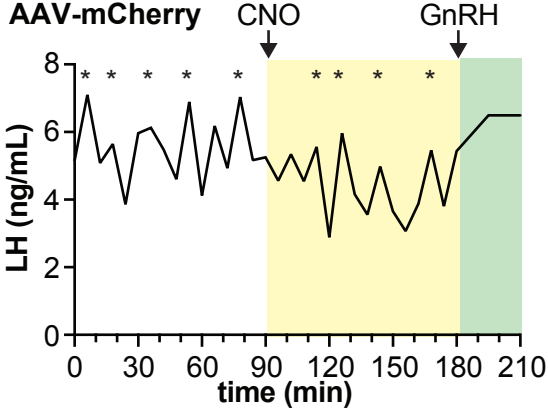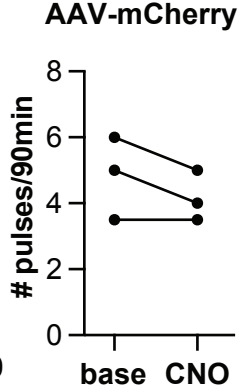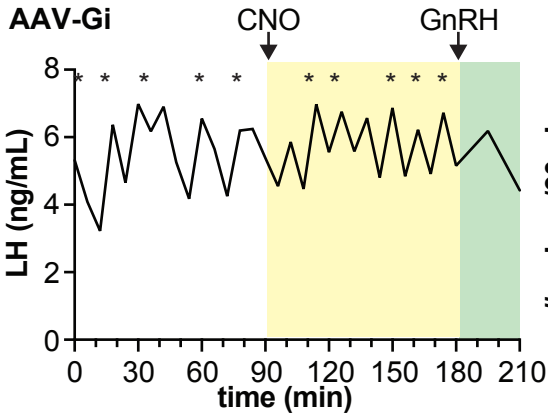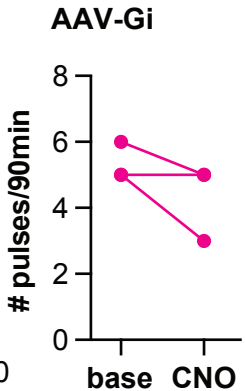

Supplement: supp [file elife-68205-supp-v1.zip]
